# Supplementary material for: A novel algorithm to predict bone changes in the mouse tibia properties under physiological conditions
Source: PubMed Central journal article supplement (PMC7203598; doi:10.1007/s10237-019-01266-7), 2019-11-30
Supplement: 10237_2019_1266_MOESM1_ESM.pdf [file 10237_2019_1266_MOESM1_ESM.pdf]

## A novel algorithm to predict bone changes in the mouse tibia properties under physiological conditions

Vee San Cheong<sup>1,3</sup>, Ana Campos Marin<sup>1,3</sup>, Damien Lacroix<sup>1,3</sup>, Enrico Dall'Ara<sup>2,3</sup>

<sup>1</sup>Department of Mechanical Engineering, University of Sheffield, United Kingdom

<sup>2</sup>Department of Oncology and Metabolism, University of Sheffield, United Kingdom

<sup>3</sup>Insigneo Institute for *in silico* Medicine, University of Sheffield, United Kingdom

Corresponding author: V. S. Cheong (v.cheong@sheffield.ac.uk)

### Supplementary Material

**Table S1** Parametric analysis conducted on the inclusion of medial-lateral (ML) load in the bone remodelling algorithm

| ML load | 0                                     |                          | 0.001BW                               |                          |
|---------|---------------------------------------|--------------------------|---------------------------------------|--------------------------|
| Mouse   | Remodelling rate, B (mg/cc-Pa-2weeks) | Apposition limit, k (Pa) | Remodelling rate, B (mg/cc-Pa-2weeks) | Apposition limit, k (Pa) |
| 1       | 0.07                                  | 0.97                     | 0.07                                  | 0.10                     |
| 2       | 0.46                                  | 10.2                     | 0.59                                  | 9.22                     |
| 3       | 0.33                                  | 0.31                     | 0.33                                  | 1.31                     |
| 4       | 0.49                                  | 12.2                     | 0.48                                  | 3.50                     |
| 5       | 0.20                                  | 0.64                     | 0.20                                  | 2.53                     |
| Average | 0.31 ± 0.18                           | 4.86 ± 5.83              | 0.33 ± 0.21                           | 3.33 ± 3.53              |

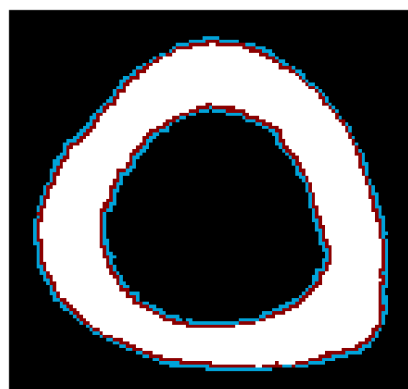

**Fig. S1** An example illustrating the voxels in the background (blue) and bone (red) that were included in the transition zone (TZ).

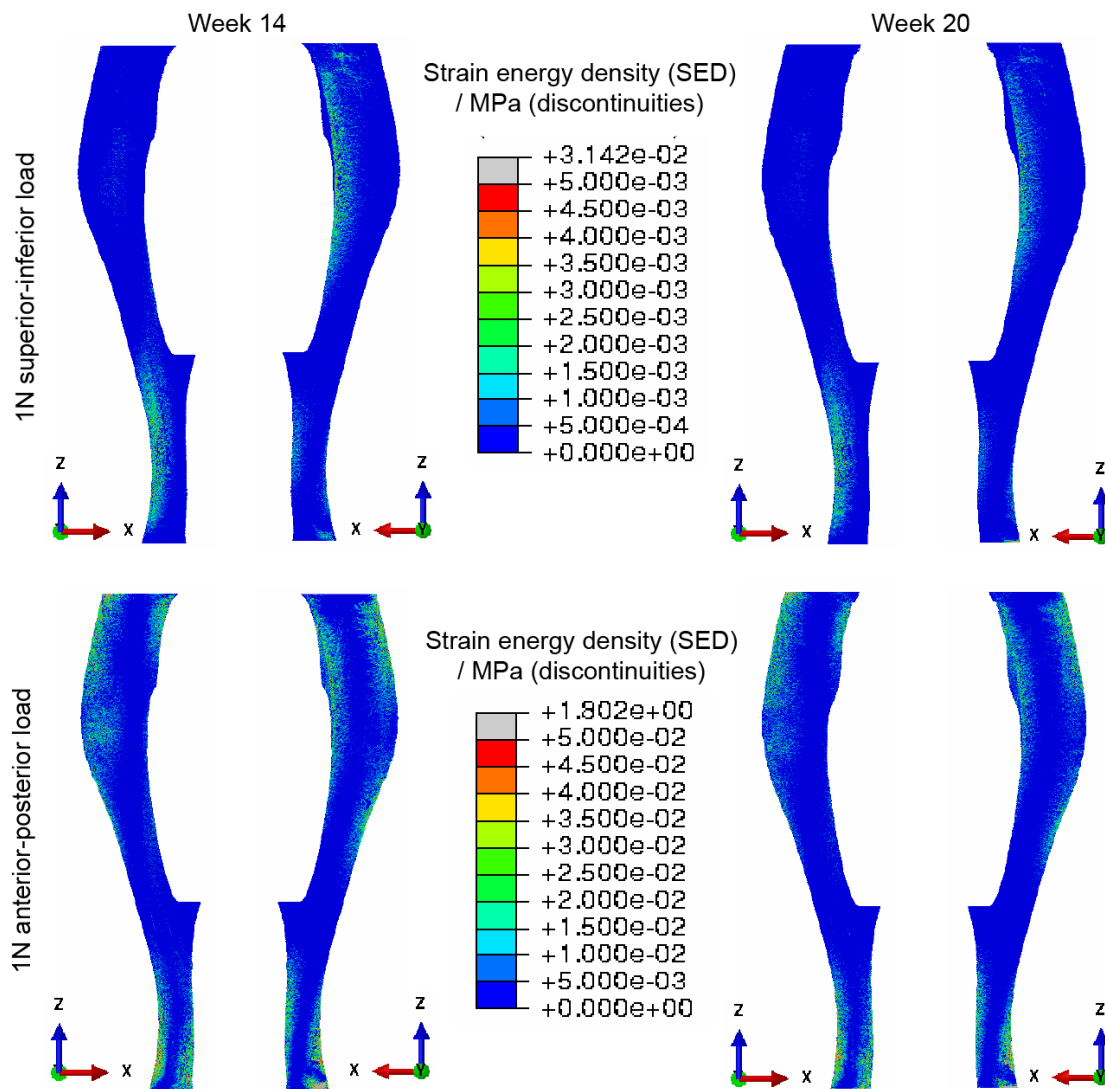

**Fig. S2** Strain energy density distribution under 1N anterior-posterior load and 1N superior-inferior load for the right tibia of mouse 5 at weeks 14 and 20. The weight of 2 mice were higher at week 20 than 14, and for another 2 mice, was lower at week 20 than week 14. The weight of one mouse remained unchanged with age. Please note the difference in scale.

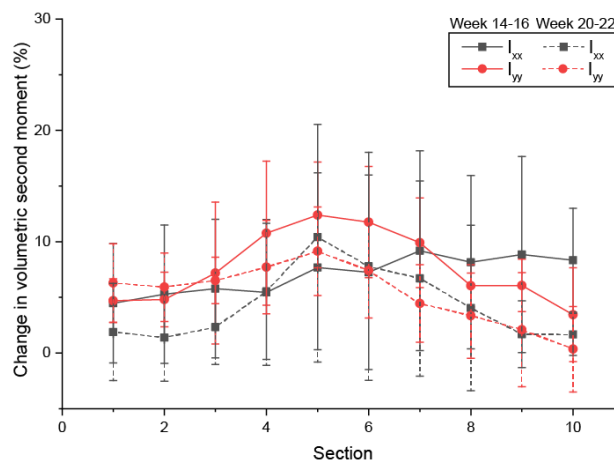

**Fig. S3** Change in volumetric second moment between week 14-16 (solid line) and week 20-22 (dashed line) for  $I_{xx}$  (black) and  $I_{yy}$  (red).

# A novel algorithm to predict bone changes in the mouse tibia properties under physiological conditions

Cheong et al.

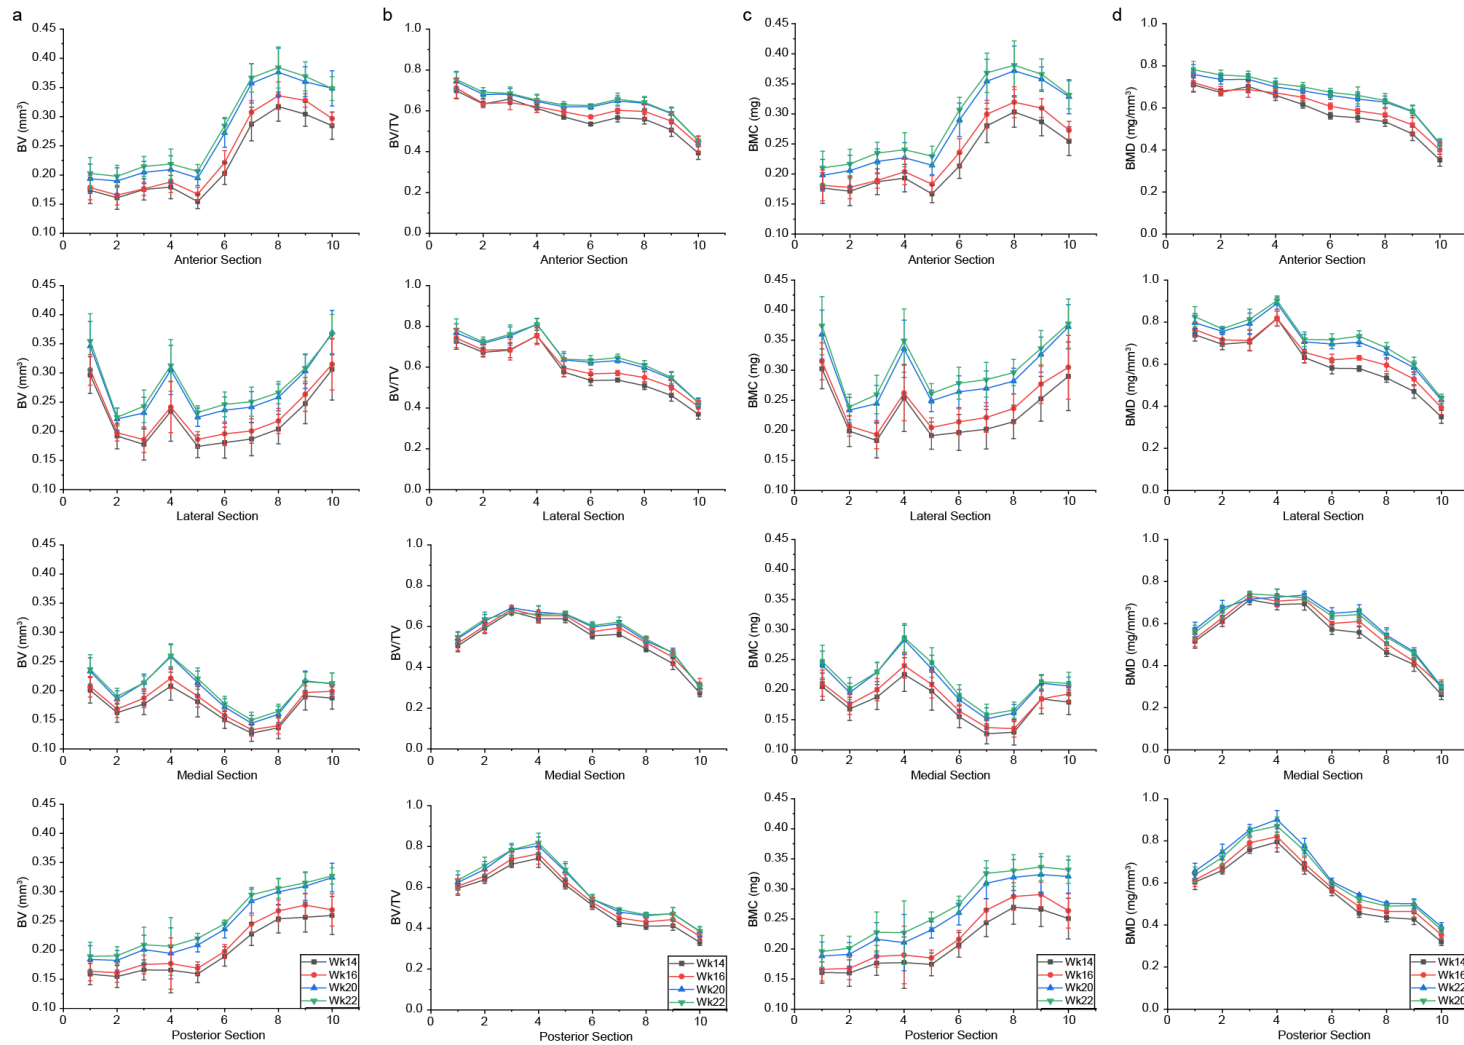

**Fig. S4** Experimentally measured BV (a), BT/TV (b), BMC (c) and BMD (d) across the 40 partitions (four sectors from top to bottom; 10 sections) of the mouse tibia for weeks 14, 16, 20 and 22. X-axis indicates longitudinal sections from distal (0) to proximal (10).

# A novel algorithm to predict bone changes in the mouse tibia properties under physiological conditions

Cheong et al.

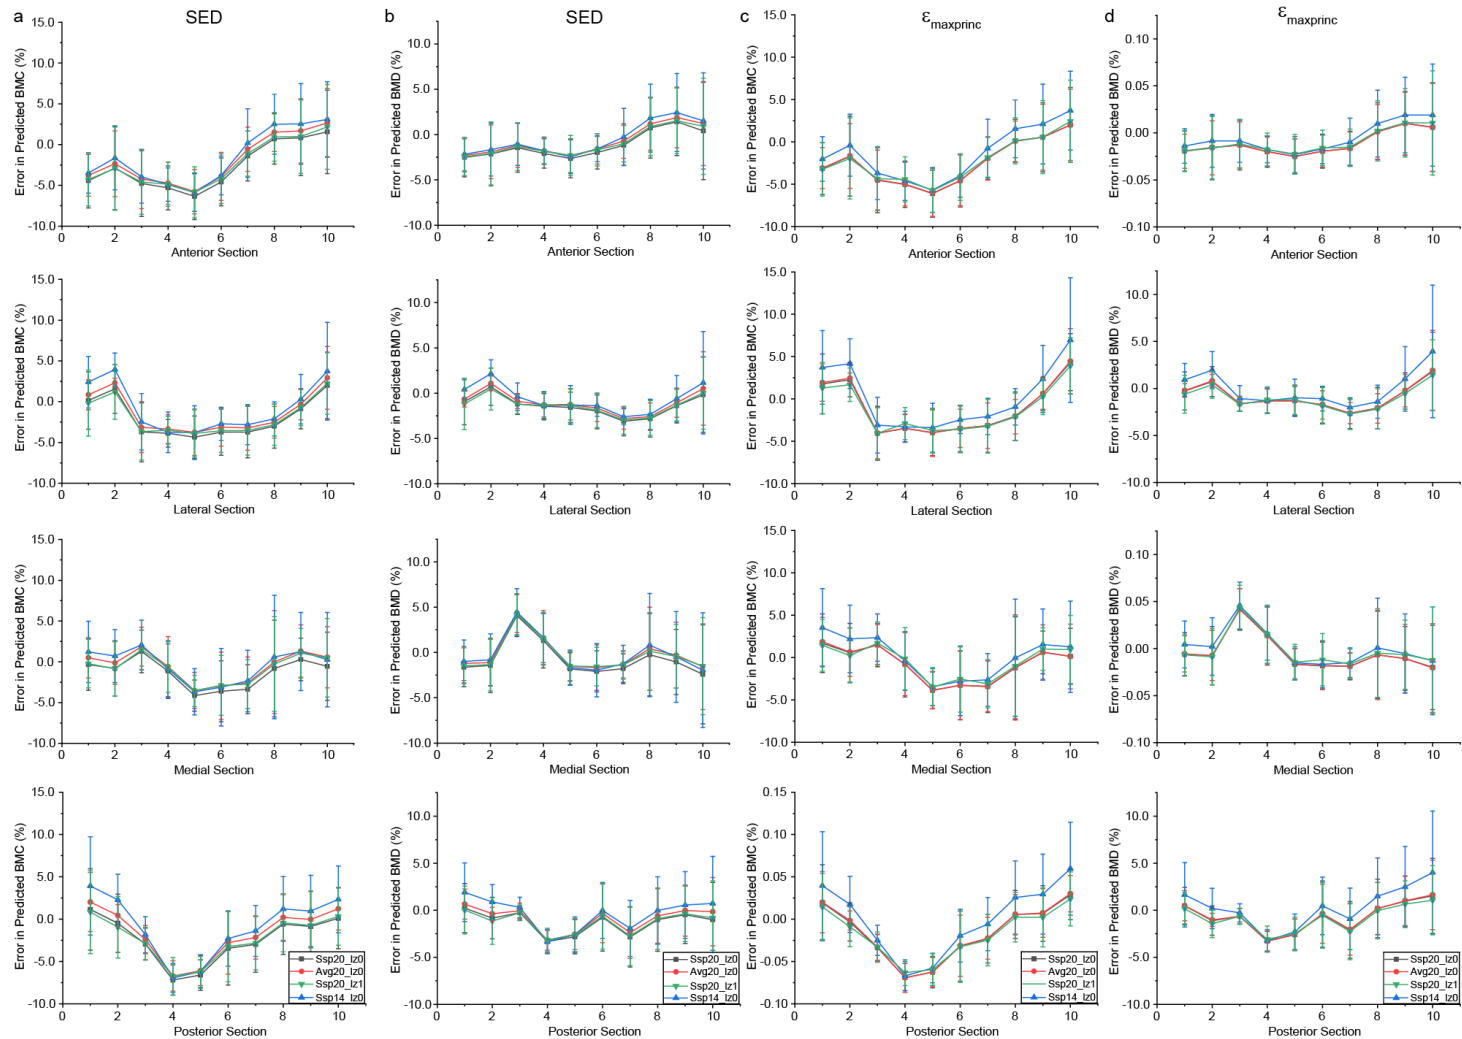

**Fig. S5** Errors in predicted BMC and BMD for (a-b)  $SED$  and (c-d)  $\epsilon_{maxprinc}$  across the 40 sections of bone. Ssp20\_lz0: subject-specific parameters from weeks 20-22, no lazy zone. Avg20\_lz0: averaged parameters from weeks 20-22, no lazy zone. Ssp20\_lz1: subject specific parameters with lazy zone from weeks 20-22, no averaging. Ssp14\_lz0: subject-specific parameters from weeks 14-16, no lazy zone. Numbers identify the mice in the experiments. X-axis indicates longitudinal sections from distal (0) to proximal (10).
